# Supplementary material for: PP2A-B55alpha controls keratinocyte adhesion through dephosphorylation of the Desmoplakin C-terminus
Source: PubMed Central journal article supplement (PMC10404246; doi:10.1038/s41598-023-37874-8), 2023-08-05
Supplement: 41598_2023_37874_MOESM1_ESM.pdf [file 41598_2023_37874_MOESM1_ESM.pdf]

# Supplemental Figure 1

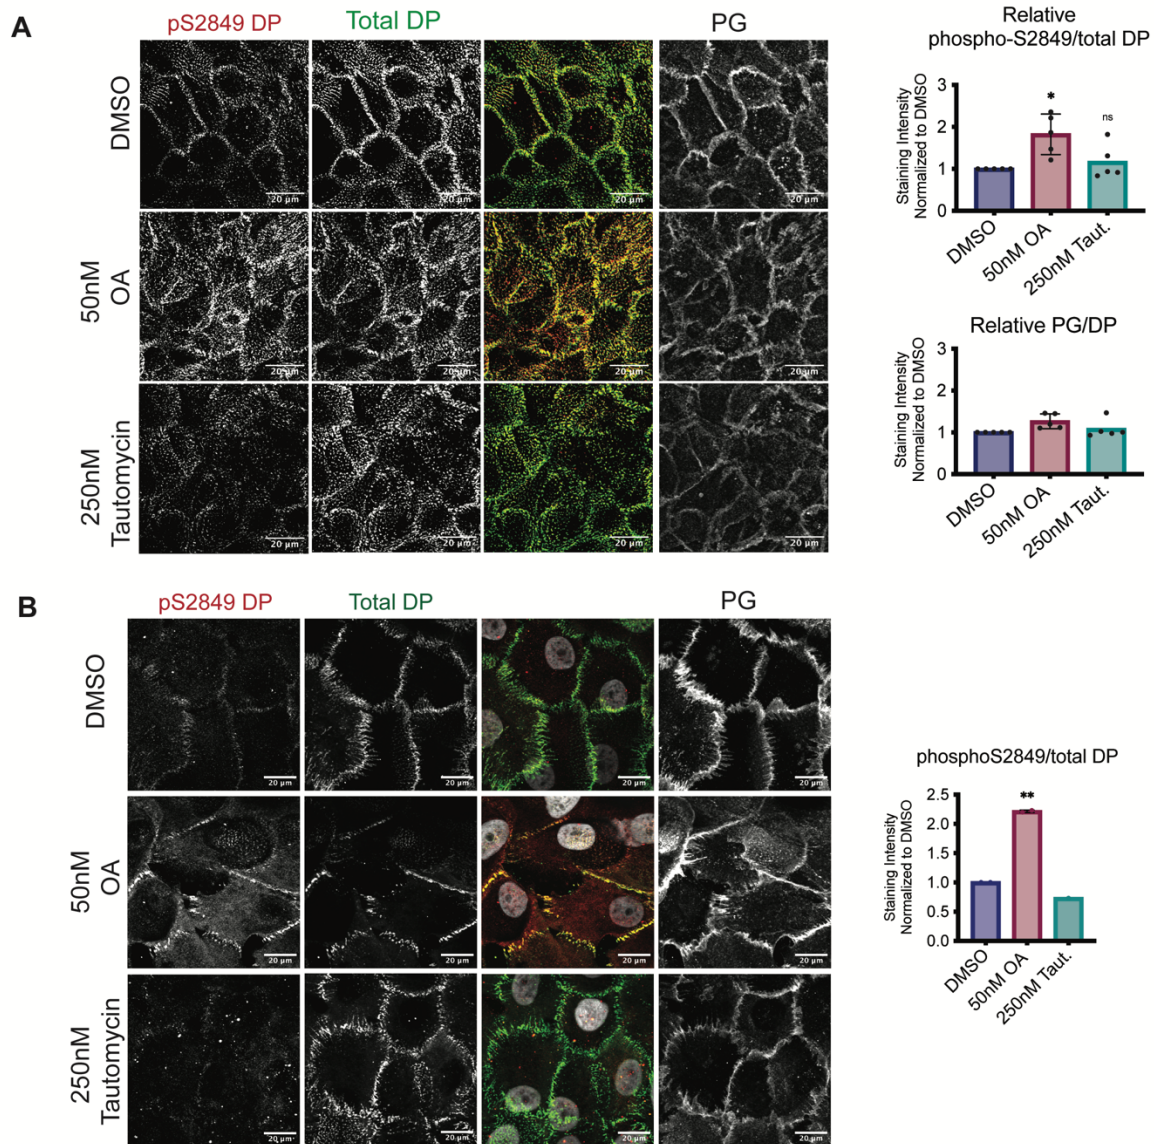

## Supplemental Figure 1

HaCaTs [A] and NHEKs [B] were treated with either DMSO, 50nM OA or 250nM Tautomycin for 3 hours. Expression levels of S2849 phosphorylated (pDP) and total DP were analyzed by immunofluorescence staining. Staining intensity was quantified at the membrane using PG stain as a mask. Statistical analyses were performed on normalized data using a One sample t comparison to 1. \* < 0.05; \*\* < .01.

## Supplemental Figure 2

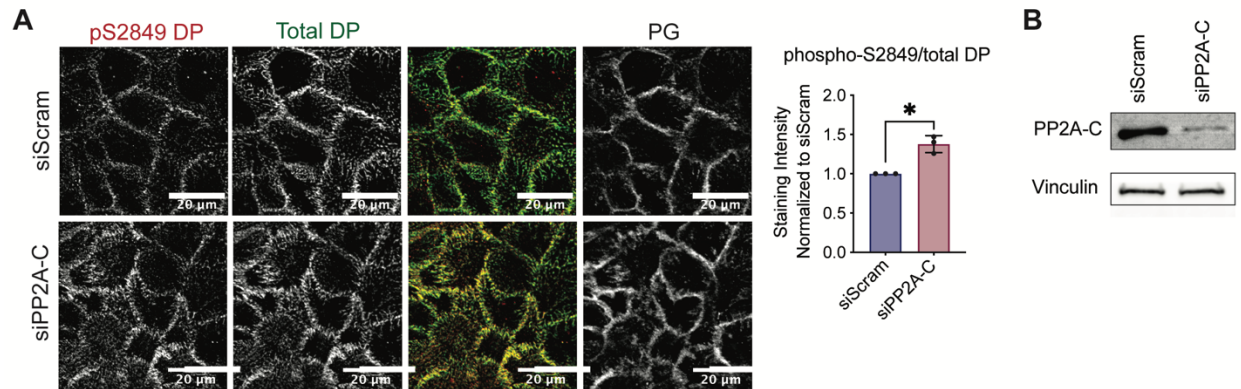

### Supplemental Figure 2

[A] Immunofluorescence staining of S2849 phosphorylated DP (pDP) in HaCaT cells transfected with siRNA targeting the PP2A-C subunit. Staining intensity from was quantified at the membrane using PG stain as a mask. [B] Western blot validation of PP2A-C knockdown in cells from [A]. Statistical analyses were performed on normalized data using a student t-test. \* < 0.05; \*\* < 0.01

# Supplemental Figure 3

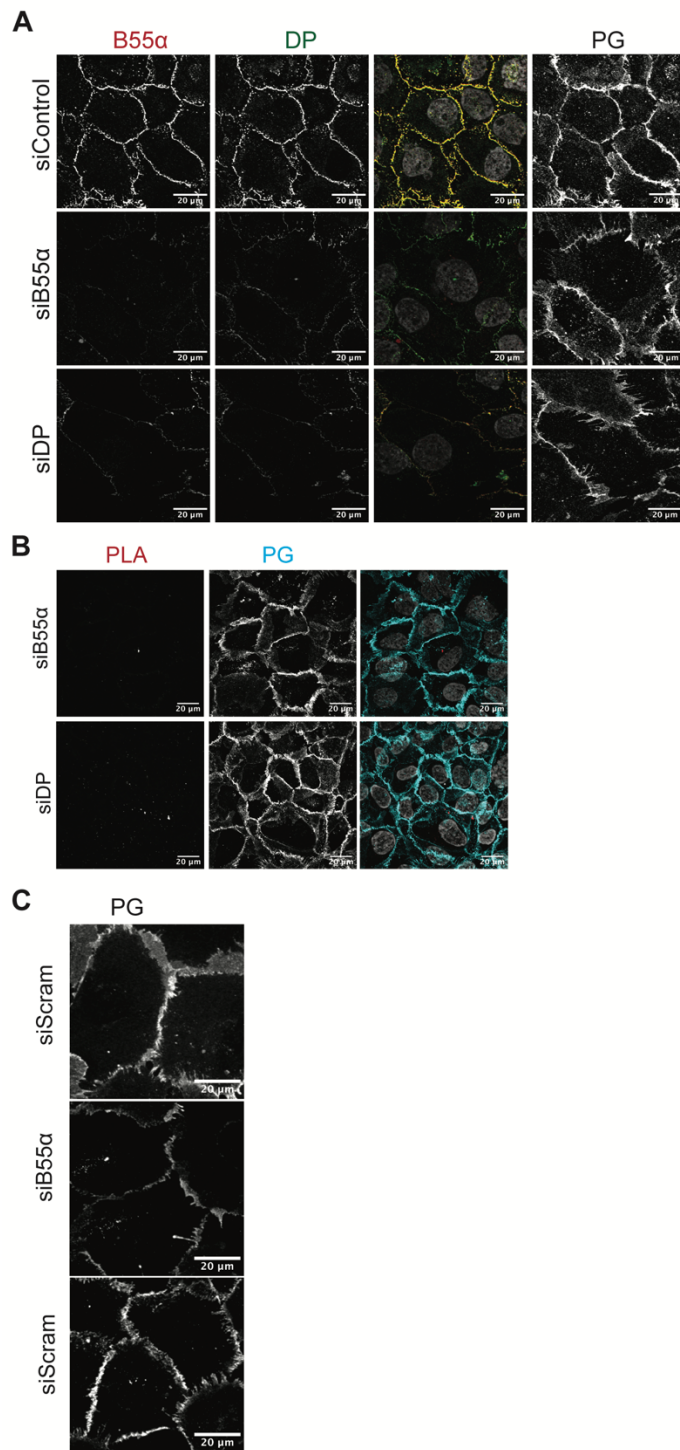

Supplemental Figure 3

Unmerged images of proximity ligation assay (PLA) in Figure 2E performed on SCC9 cells transfected with siRNA targeting either a scramble control, B55 $\alpha$ , or DP. A fluorescence-based PLA signal was measure on fixed coverslips incubated with B55 $\alpha$  and DP targeting antibodies. [B] SCC9s transfected with siRNA targeting B55 $\alpha$  or DP and analyzed by immunofluorescence. [C] PG immunofluorescence staining of siB55 $\alpha$  transfected SCC9s from Figure 2E.

## Supplemental Figure 4

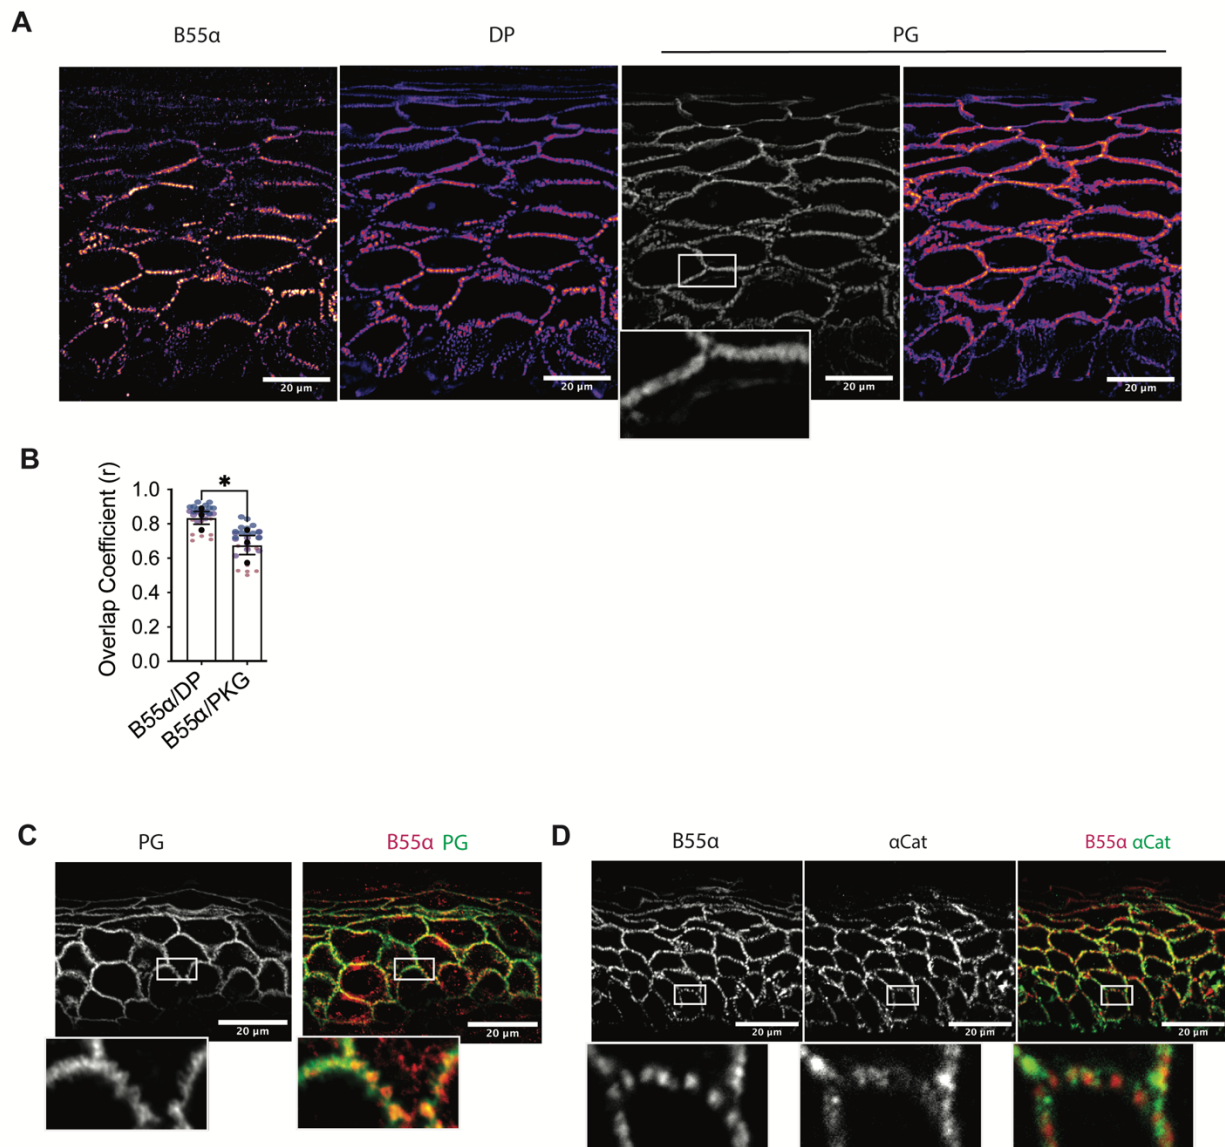

## Supplemental Figure 4

[A] Staining intensities of B55 $\alpha$ , DP, and PG across the 3D-reconstructed skin is shown using a HEAT map representation. [C] Colocalization analysis of Figure 3A as determined

by an object-based colocalization analysis tool represented as overlap coefficient measurements. [C-D] PG, B55 $\alpha$ , and  $\alpha$ -catenin staining in human skin samples.

# Supplemental Figure 5: Uncut Blots

**1B**

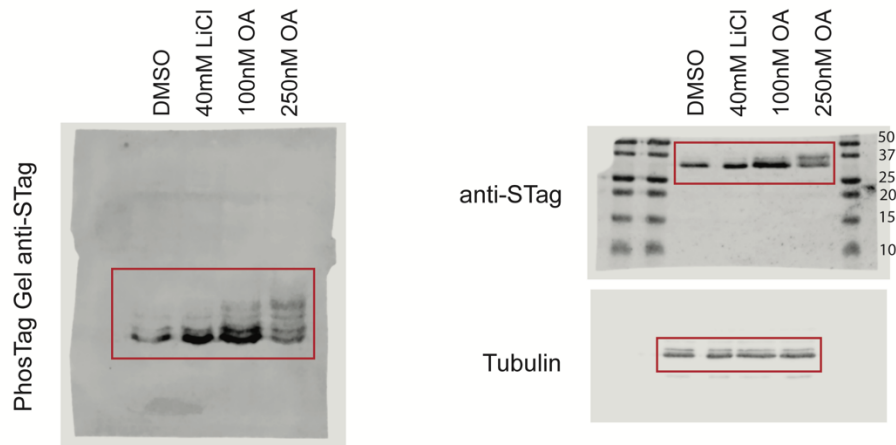

**1C/D**

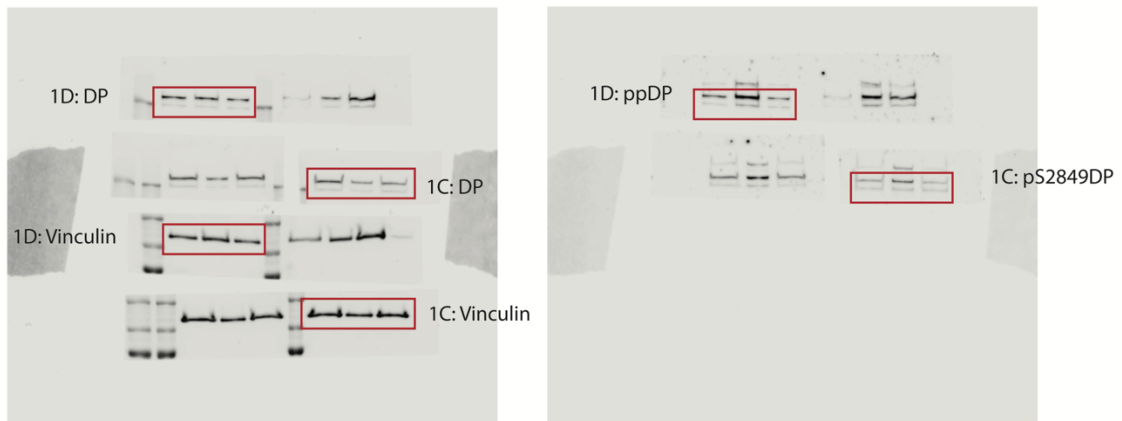

**1F/4C**

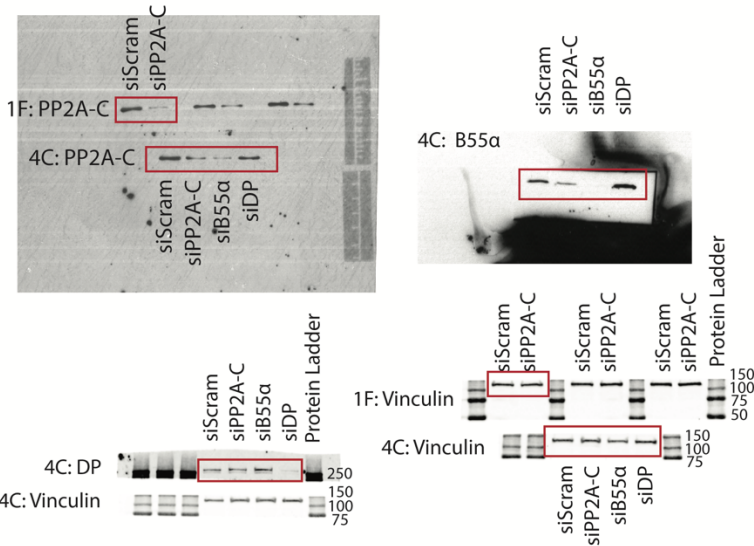

**4F**

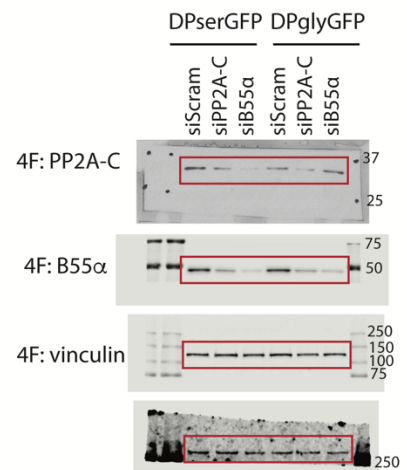

**SCC9 1G**

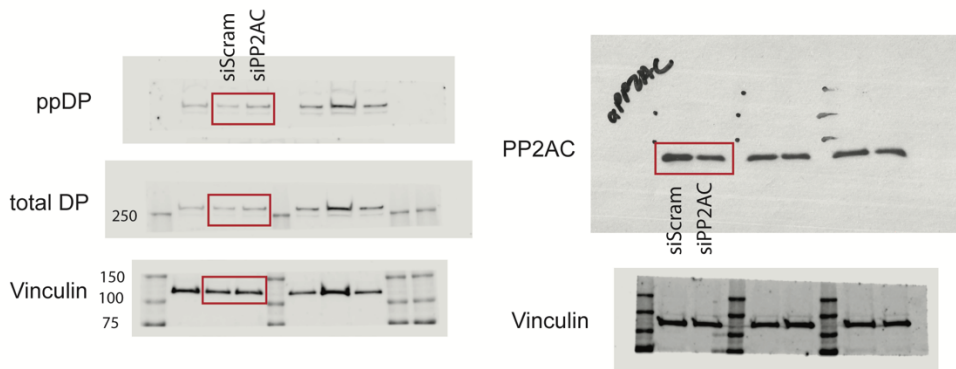

**SCC9 2A/2B**

SCC9 IP:

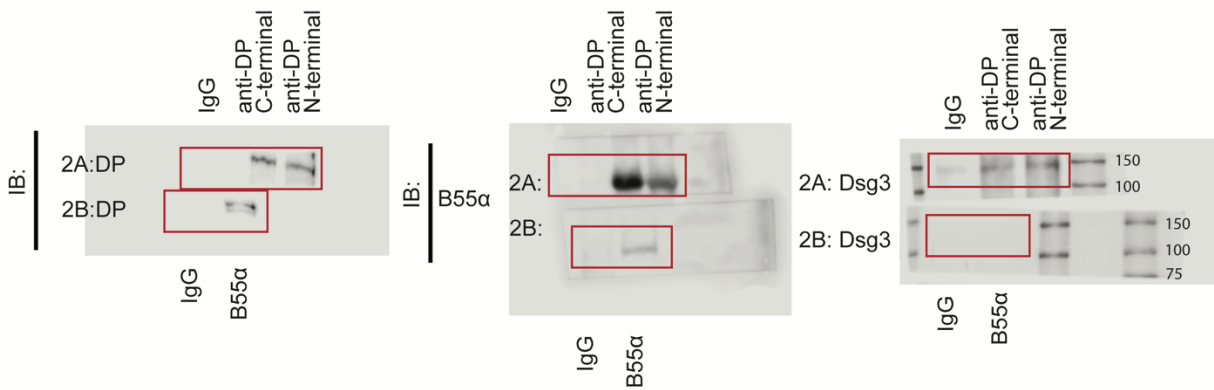

**NHEK 2A/2B**

NHEK IP:

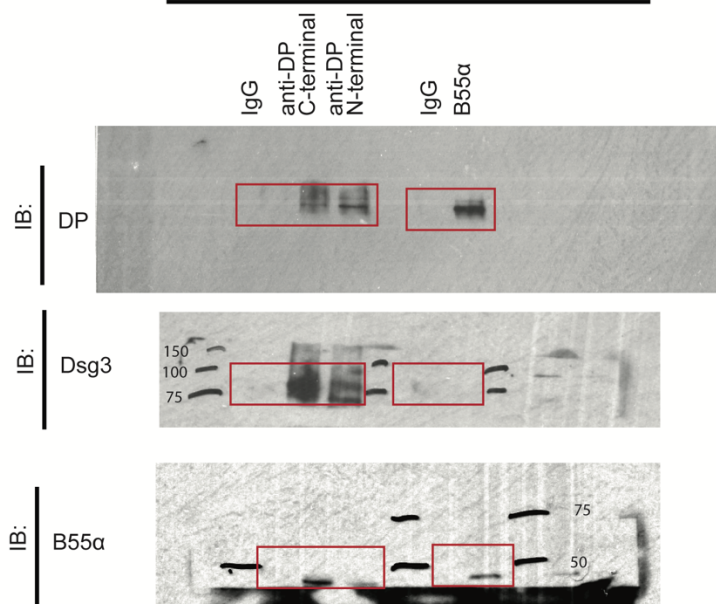

**SCC9 2F**

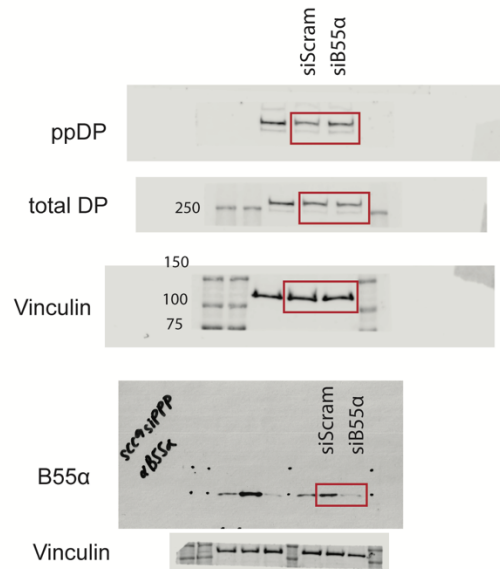

**Supplemental Figure 5**

All uncropped blots presented in manuscript are labeled and shown above.
